# Supplementary material
Source: Frontiers journal article supplement (https://www.frontiersin.org/articles/492310)
Supplement: Data_Sheet_1.PDF [file Data_Sheet_1.PDF]

## VariantPlex<sup>®</sup> CTL

**Part # SK0112**

### Description

The VariantPlex<sup>®</sup> CTL panel is an optimized balance of gene-specific primer (GSP) oligonucleotides that is used in conjunction with VariantPlex<sup>®</sup> HS Reagents for Illumina<sup>®</sup> (SK0117) and Molecular Barcode (MBC) Adapters to produce targeted NGS libraries of 290 regions of interest across 31 genes frequently mutated in NSCLC and thyroid cancer.

### Contents

| Description                                                         | Part Number | Storage Conditions |
|---------------------------------------------------------------------|-------------|--------------------|
| VariantPlex <sup>®</sup> CTL GSP1 - 8 reactions                     | SA0071081   | -20°C ± 10°C       |
| VariantPlex <sup>®</sup> CTL GSP2 - 8 reactions                     | SA0071082   |                    |
| Archer <sup>®</sup> PreSeq <sup>™</sup> DNA QC Assay Standard       | SA0597      |                    |
| Archer <sup>®</sup> PreSeq <sup>™</sup> DNA QC Assay 10x Primer Mix | SA0598      |                    |

### Required Reagent volumes:

| Protocol Reference | Protocol Step*          | Reagent                                       | Required volume (per reaction) |
|--------------------|-------------------------|-----------------------------------------------|--------------------------------|
| A                  | Ligation Step 2 Elution | 5mM NaOH                                      | 36µL                           |
| B                  | First PCR               | VariantPlex <sup>®</sup> CTL GSP1 (SA0071081) | 4µL                            |
| C                  | First PCR               | 10mM Tris-HCl pH 8.0                          | 38µL                           |
| D                  | First PCR               | Purified PCR1 eluate                          | 36µL                           |
| E                  | Second PCR              | VariantPlex <sup>®</sup> CTL GSP2 (SA0071082) | 4µL                            |

\*Refers to steps within LA560

|                            | Step | Temperature (°C) | Time                   | Cycles |
|----------------------------|------|------------------|------------------------|--------|
| <b>First PCR Reaction</b>  | 1    | 95               | 3 minutes              | 1      |
|                            | 2    | 95               | 30 seconds             | 18     |
|                            | 3    | 65               | 3 min (100% ramp rate) |        |
|                            | 4    | 72               | 3 minutes              | 1      |
|                            | 5    | 4                | Hold                   | 1      |
| <b>Second PCR Reaction</b> | 1    | 95               | 3 minutes              | 1      |
|                            | 2    | 95               | 30 seconds             | 24*    |
|                            | 3    | 65               | 3 min (100% ramp rate) |        |
|                            | 4    | 72               | 3 minutes              | 1      |
|                            | 5    | 4                | Hold                   | 1      |

## Recommended PCR Cycling:

\*The number of PCR2 cycles may be decreased if you regularly experience library yields greater than 200nM.

## Recommended Reads and Multiplexing

VariantPlex CTL libraries produced should be sequenced to a minimum of **1.0M** reads per sample. Based on end-user experience, fewer reads may be sufficient for libraries prepared using limited input masses. For more information, visit our frequently asked questions resource page at: [www.archerdx.com/faqs](http://www.archerdx.com/faqs)

## Assay Targets

| Gene   | Accession Number | Exon Number                         | SNV & Small Indel | CNV |
|--------|------------------|-------------------------------------|-------------------|-----|
| AKT1   | NM_005163        | 3, 6                                | yes               | no  |
| ALK    | NM_004304        | 21, 22, 23, 25                      | yes               | yes |
| BRAF   | NM_004333        | 11, 15                              | yes               | no  |
| CCND1  | NM_053056        | n/a (intergenic)                    | no                | yes |
| CTNNB1 | NM_001904        | 3                                   | yes               | no  |
| DDR2   | NM_006182        | 12, 13, 14, 15, 16, 17, 18          | yes               | yes |
| EGFR   | NM_005228        | 3, 7, 15, 18, 19, 20, 21            | yes               | yes |
| EIF1AX | NM_001412        | 1, 2, 3, 4, 5, 6, 7                 | yes               | no  |
| ERBB2  | NM_004448        | 10, 19, 20, 21, 24                  | yes               | yes |
| FGFR1  | NM_015850        | 4, 7, 8, 13, 15, 17                 | yes               | yes |
| FGFR2  | NM_000141        | 7, 9, 12, 14                        | yes               | yes |
| FGFR3  | NM_000142        | 7, 8, 9, 14, 15, 16, 18             | yes               | yes |
| GNAS   | NM_000516        | 6, 7, 8, 9                          | yes               | yes |
| HRAS   | NM_005343        | 2, 3                                | yes               | no  |
| IDH1   | NM_005896        | 3, 4                                | yes               | no  |
| IDH2   | NM_002168        | 4                                   | yes               | no  |
| KIT    | NM_000222        | 2, 8, 9, 10, 11, 13, 14, 15, 17, 18 | yes               | yes |
| KRAS   | NM_004985        | 2, 3, 4, 5                          | yes               | yes |
| MAP2K1 | NM_002755        | 2, 3                                | yes               | no  |
| MDM2   | NM_002392        | 2, 3, 4, 6, 8, 10                   | no                | yes |
| MET    | NM_000245        | 2, 11, 14, 16, 19, 21               | yes               | yes |
| NRAS   | NM_002524        | 2, 3, 4, 5                          | yes               | yes |
| PDGFRA | NM_006206        | 12, 14, 15, 18, 23                  | yes               | yes |
| PIK3CA | NM_006218        | 2, 5, 7, 8, 10, 14, 19, 21          | yes               | yes |
| PTEN   | NM_000314        | 1, 2, 3, 4, 5, 6, 7, 8, 9           | yes               | yes |
| RET    | NM_020630        | 10, 11, 13, 14, 15, 16              | yes               | yes |
| ROS1   | NM_002944        | 38                                  | yes               | no  |
| STK11  | NM_000455        | 1, 2, 3, 4, 5, 6, 7, 8, 9           | yes               | yes |
| TERT   | NM_198253        | Promoter, 1                         | yes               | no  |
| TP53   | NM_000546        | 1, 2, 3, 4, 5, 6, 7, 8, 9, 10, 11   | yes               | yes |
| TSHR   | NM_000369        | 10                                  | yes               | no  |

## Archer Analysis Settings

Sequencing data produced by this method must be converted to de-multiplexed FASTQ's, and then processed using [Archer Analysis](#) (v5.1 or greater). This provides all secondary analysis (read trimming/cleaning, de-duplication, error correction, alignment, and mutation calling), as well as some tertiary analysis (e.g., annotations and protein effect predictions). Analysis will produce detailed mutation reporting via graphical user interface, as well as raw text and BAM outputs.

The VariantPlex CTL libraries supports the following DNA Analysis Types: **DNA Copy Number Variation, DNA SNP/InDel, and DNA Structural Variation** in Archer Analysis (see the software user manual for further details on setting up analyses).

The Archer Analysis software is available as a separate download, which can be requested via a webform on the product webpage: [Archer Analysis](#). VariantPlex CTL also requires a one-time upload of a Target Region file (a text file, in GTF format, which directs the software on how to analyze data from the panel) which can be obtained by contacting [tech@archerdx.com](mailto:tech@archerdx.com).

## Limitations of Use

**For Research Use Only.** Not for use in diagnostic procedures. Not intended to be used for treatment of human or animal diseases.

Safety data sheets pertaining to this product are available upon request.

© 2017 ArcherDX, Inc. All rights reserved. Reveal ctDNA™, VariantPlex®, PreSeq®, Archer® and FusionPlex® are trademarks of ArcherDX, Inc. Illumina®, NextSeq® and MiSeq® are registered trademarks of Illumina, Inc. Agencourt®, AMPure® and FormaPure® are registered trademarks of Agencourt Biosciences Corporation, a Beckman Coulter company. SYBR®, Life Technologies™, DynaMag™, Thermo Scientific™, Qubit™ and Maxima™ are registered trademarks of Thermo Fisher Scientific, Inc. KAPA Biosystems® is a registered trademark of KAPA Biosystems, Inc. RNase Away™ is a registered trademark of Molecular Bio-Products, Inc. BioRad®, iTaq™, and SsoAdvanced™ are registered trademarks of Bio-Rad Laboratories, Inc. Qiagen® and QuantiTect® are registered trademarks of Qiagen, Inc.

### ArcherDX, Inc.

2477 55th Street, Suite 202  
Boulder, CO 80301  
303-357-9001  
<http://www.archerdx.com>
